# Supplementary material
Source: PubMed Central journal article supplement (PMC4351917)
Supplement: NIHMS62268-supplement-SI_1.pdf [file NIHMS62268-supplement-SI_1.pdf]

# Supporting Information

## **A novel class of bis- and tris-chelate diam(m)inebis(dicarboxylato)- platinum(IV) complexes as potential anticancer prodrugs**

*Hristo P. Varbanov<sup>†\*</sup>, Simone Göschl<sup>†</sup>, Petra Heffeter<sup>§‡</sup>, Sarah Theiner<sup>†‡</sup>, Alexander Roller<sup>†</sup>,  
Frank Jensen<sup>‡</sup>, Michael A. Jakupec<sup>†‡</sup>, Walter Berger<sup>§‡</sup>, Markus Galanski<sup>†\*</sup>, and Bernhard K.  
Keppler<sup>†‡</sup>*

<sup>†</sup> University of Vienna, Institute of Inorganic Chemistry, Währinger Strasse 42, A-1090 Vienna, Austria

<sup>§</sup> Comprehensive Cancer Center and Department of Medicine I, Institute of Cancer Research, Medical University of Vienna, Borschkegasse 8a, 1090 Vienna, Austria

<sup>‡</sup> Research Platform “Translational Cancer Therapy Research”, University of Vienna, Währinger Strasse 42, 1090 Vienna, Austria

<sup>‡</sup> University of Aarhus, Department of Chemistry, Langelandgade 140, 8000 Aarhus C, Denmark

## Contents

- Page S3**    **Figure S1.** TG/DTA curves of compound **1b**.
- Page S4**    **Figure S2.**  $^1\text{H}^{13}\text{C}$  HMBC spectra of complex **5b\*** after addition of ascorbate.
- Page S4**    **Figure S3.** Scheme of the proposed reduction pathway of novel diam(m)inebis(dicarboxylato) platinum(IV) complexes.
- Page S5**    **Figure S4.** Platinum accumulation in mice tissues, blood and urine after treatment with **4b** (CT-26 model, 30 mg/kg, i.p.).
- Page S6**    **Table S1.**  $^{195}\text{Pt}$  and  $^{15}\text{N}$  NMR chemical shifts of novel diam(m)inebis-(dicarboxylato)platinum(IV) complexes
- Page S7**    **Table S2.** Crystal data and details of data collection for **1c** and **4a**.
- Page S8**    **Table S3.** Elemental analysis data.

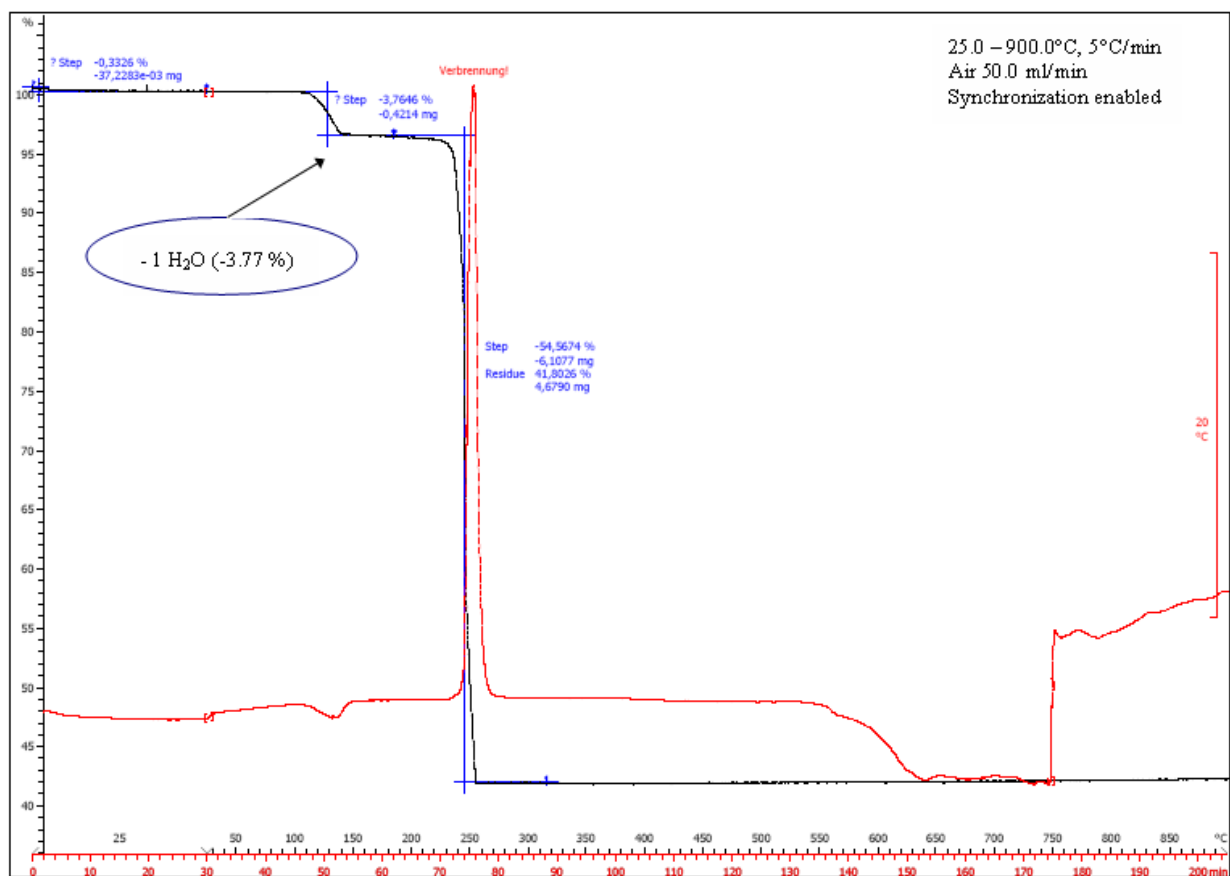

**Figure S1.** TG/DTA curves of compound **1b**; heating up to 900°C with a rate of 5°C/min and flushing with air.

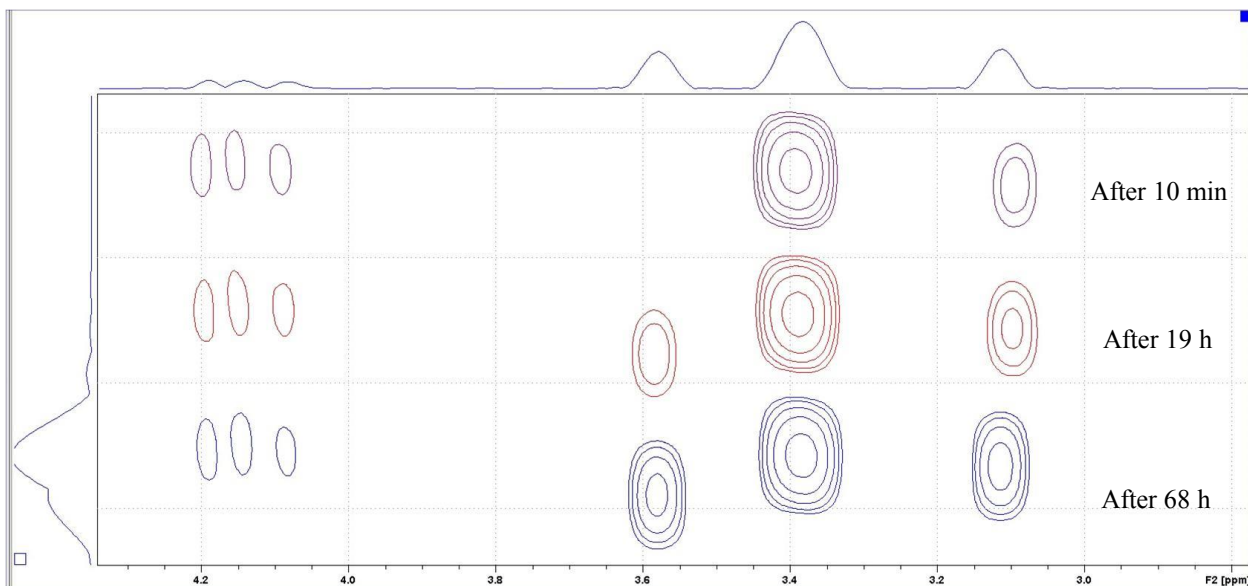

**Figure S2.** Time dependent  $^1\text{H}^{13}\text{C}$  HMBC spectra of  $^{13}\text{C}$ -labeled complex **5b\*** after addition of ascorbate; after 10 min (top), 19 h (middle) and 68 h (bottom); shift correlation signals between  $\text{CH}_2$  protons in the region 3.09-4.20 ppm and  $^{13}\text{C}=\text{O}$  resonances in the region 174.3-178.1 ppm are shown.

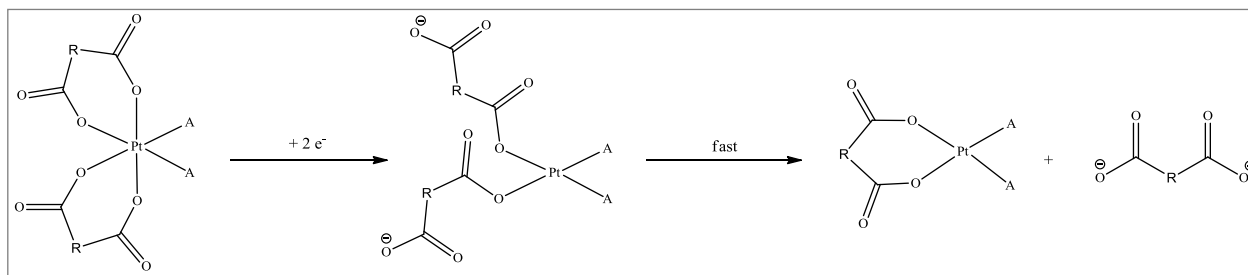

**Figure S3.** Scheme of the proposed reduction pathway of novel diam(m)inebis(dicarboxylato)platinum(IV) complexes ( $\text{A} = \text{NH}_3$ ,  $\text{EtNH}_2$  or cyclohexylamine, or  $\text{A}_2 = \text{ethane-1,2-diamine}$  or  $(1R,2R)$ -diaminocyclohexane;  $\text{R}(\text{COOH})_2 = \text{oxalic}$ , malonic, 3-methylmalonic or 1,1-cyclobutanedicarboxylic acid).

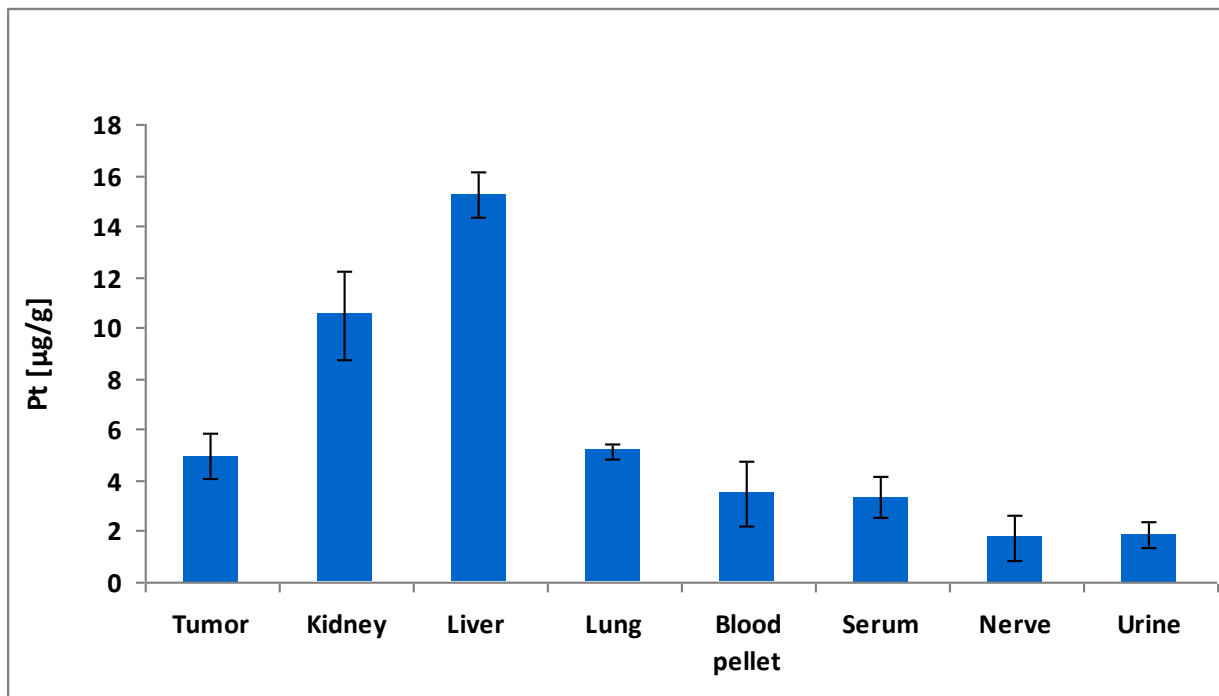

**Figure S4.** Platinum accumulation in mice tissues, blood and urine collected on day 15 from the CT-26 experiment. Mice were treated on day 4, 7, 11 and 14 with 30 mg/kg of **4b** (i.p.).

**Table S1.**  $^{195}\text{Pt}$  and  $^{15}\text{N}$  NMR chemical shifts of novel diam(m)inebis(dicarboxylato)platinum(IV) complexes (in DMF-d<sub>7</sub>, values in ppm).

| <b>complex</b>        | $^{195}\text{Pt}$ | $^{15}\text{N}$ |
|-----------------------|-------------------|-----------------|
| <b>1a<sup>a</sup></b> | 2782              | -13.7           |
| <b>1b</b>             | 3162              | -10.1           |
| <b>1c</b>             | 3171              | -9.1            |
| <b>1d</b>             | 3198              | -10.3           |
| <b>2b</b>             | 3324              | -21.8           |
| <b>3b<sup>a</sup></b> | 3375              | -43.8           |
| <b>4a</b>             | 2815 and 2811     | -3.7            |
| <b>4b</b>             | 3206 and 3198     | 0.9             |
| <b>5b</b>             | 3370              | -12.2; -44.0    |

<sup>a</sup> spectra measured in DMSO-d<sub>6</sub>.

**Table S2.** Crystal data and details of data collection for **1c** and **4a**.

| <b>Compound</b>                            | <b>1c</b>                                                         | <b>4a</b>                                                         |
|--------------------------------------------|-------------------------------------------------------------------|-------------------------------------------------------------------|
| Empirical formula                          | C <sub>16</sub> H <sub>31</sub> N <sub>3</sub> O <sub>11</sub> Pt | C <sub>16</sub> H <sub>28</sub> N <sub>4</sub> O <sub>10</sub> Pt |
| Fw                                         | 636.53                                                            | 631.51                                                            |
| space group                                | <i>P</i> 2 <sub>1</sub> / <i>n</i>                                | <i>P</i> 2 <sub>1</sub> 2 <sub>1</sub> 2 <sub>1</sub>             |
| <i>a</i> , Å                               | 13.8623(4)                                                        | 8.9059(5)                                                         |
| <i>b</i> , Å                               | 8.8623(4)                                                         | 11.2218(6)                                                        |
| <i>c</i> , Å                               | 18.7397(5)                                                        | 22.0760(11)                                                       |
| $\beta$ (deg)                              | 97.841(1)                                                         |                                                                   |
| <i>V</i> [Å <sup>3</sup> ]                 | 2217.81(10)                                                       | 2206.3(2)                                                         |
| <i>Z</i>                                   | 4                                                                 | 4                                                                 |
| $\lambda$ [Å]                              | 0.71073                                                           | 0.71073                                                           |
| $\rho_{\text{calcd}}$ , g cm <sup>-3</sup> | 1.906                                                             | 1.901                                                             |
| crystal size, mm <sup>3</sup>              | 0.16 × 0.16 × 0.04                                                | 0.08 × 0.06 × 0.05                                                |
| <i>T</i> [K]                               | 100(2)                                                            | 100(2)                                                            |
| $\mu$ , mm <sup>-1</sup>                   | 6.388                                                             | 6.419                                                             |
| <i>R</i> <sub>1</sub> <sup>a</sup>         | 0.0258                                                            | 0.0472                                                            |
| <i>wR</i> <sub>2</sub> <sup>b</sup>        | 0.0645                                                            | 0.1087                                                            |
| GOF <sup>c</sup>                           | 1.069                                                             | 1.098                                                             |
| Flack parameter                            |                                                                   | -0.002(18)                                                        |

<sup>a</sup> $R_1 = \Sigma||F_o| - |F_c||/\Sigma|F_o|$ . <sup>b</sup> $wR_2 = \{\Sigma[w(F_o^2 - F_c^2)^2]/\Sigma[w(F_o^2)^2]\}^{1/2}$ . <sup>c</sup> GOF =  $\{\Sigma[w(F_o^2 - F_c^2)^2]/(n - p)\}^{1/2}$ , where *n* is the number of reflections and *p* is the total number of parameters refined.

**Table S3.** Elemental analysis data.

| Complex   | Formula                                                                              | MW     | Calculated (%) |      |      |       | Found (%) |      |      |       |
|-----------|--------------------------------------------------------------------------------------|--------|----------------|------|------|-------|-----------|------|------|-------|
|           |                                                                                      |        | C              | H    | N    | O     | C         | H    | N    | O     |
| <b>2</b>  | C <sub>4</sub> H <sub>18</sub> N <sub>2</sub> O <sub>4</sub> Pt•0.1H <sub>2</sub> O  | 355.08 | 13.53          | 5.17 | 7.89 | 18.47 | 13.61     | 4.90 | 7.59 | 18.43 |
| <b>1b</b> | C <sub>8</sub> H <sub>12</sub> N <sub>2</sub> O <sub>8</sub> Pt•H <sub>2</sub> O     | 477.28 | 20.13          | 2.96 | 5.87 | 30.17 | 20.05     | 2.95 | 5.82 | 29.78 |
| <b>1c</b> | C <sub>10</sub> H <sub>16</sub> N <sub>2</sub> O <sub>8</sub> Pt•H <sub>2</sub> O    | 505.34 | 23.77          | 3.59 | 5.54 | 28.49 | 23.63     | 3.48 | 5.56 | 28.11 |
| <b>1d</b> | C <sub>14</sub> H <sub>20</sub> N <sub>2</sub> O <sub>8</sub> Pt•2.5H <sub>2</sub> O | 584.43 | 28.77          | 4.31 | 4.79 | 28.74 | 28.55     | 4.03 | 4.65 | 28.79 |
| <b>2b</b> | C <sub>10</sub> H <sub>18</sub> N <sub>2</sub> O <sub>8</sub> Pt                     | 489.34 | 24.55          | 3.71 | 5.73 | 26.16 | 24.65     | 3.49 | 5.47 | 26.44 |
| <b>3b</b> | C <sub>6</sub> H <sub>10</sub> N <sub>2</sub> O <sub>8</sub> Pt•H <sub>2</sub> O     | 451.25 | 15.97          | 2.68 | 6.21 | 31.91 | 15.76     | 2.74 | 6.24 | 32.25 |
| <b>4a</b> | C <sub>10</sub> H <sub>14</sub> N <sub>2</sub> O <sub>8</sub> Pt                     | 485.31 | 24.75          | 2.91 | 5.77 | 26.37 | 24.63     | 2.83 | 5.66 | 26.38 |
| <b>4b</b> | C <sub>12</sub> H <sub>18</sub> N <sub>2</sub> O <sub>8</sub> Pt•H <sub>2</sub> O    | 531.37 | 27.12          | 3.79 | 5.27 | 27.10 | 27.11     | 3.52 | 5.14 | 26.74 |
| <b>5b</b> | C <sub>12</sub> H <sub>20</sub> N <sub>2</sub> O <sub>8</sub> Pt•0.6H <sub>2</sub> O | 526.18 | 27.39          | 4.06 | 5.32 | 26.15 | 27.33     | 3.90 | 5.22 | 26.42 |
